# Supplementary material for: Highly specific determination of gentamicin by induced collapse of Au–lipid capsules
Source: Royal Society of Chemistry journal article supplement (doi:10.1039/c5ra21752k), 2016-01-01
Supplement: c5ra21752k1.pdf [file c5ra21752k1.pdf]

*Supplementary material*

**High specific determination of gentamicin by induced collapse of Au-lipid capsule**

Qianjin Liu<sup>§a,b,c</sup>, Haibo Mu<sup>§a</sup>, Chunli Sun<sup>c</sup> and Jinyou Duan<sup>\*a</sup>

<sup>a</sup> College of science, Northwest A&F University, Yangling 712100, Shaanxi, China

<sup>b</sup> Key Laboratory of Animal Models and Human Disease Mechanisms of the Chinese Academy of Sciences and Yunnan Province, Kunming Institute of Zoology, Kunming, Yunnan, China

<sup>c</sup> Kunming College of Life Science, University of Chinese Academy of Sciences, Kunming, Yunnan 650204, China

Correspondence:

Jinyou Duan, Ph.D

Tel.: +86 29 87092226;

E-mail: [jduan@nwsuaf.edu.cn](mailto:jduan@nwsuaf.edu.cn)

<sup>§</sup> These authors contributed equally to this work

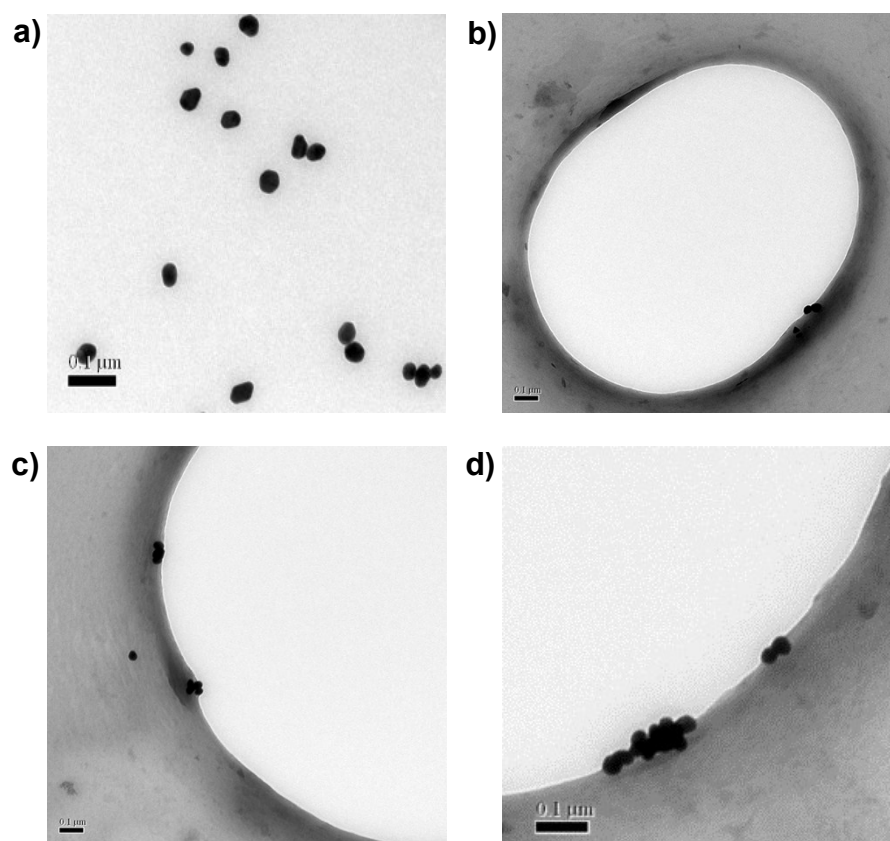

**Fig. S1.** The TEM images of AuNPs (a), liposome (b) and Au-lipid capsule (c) and (d).

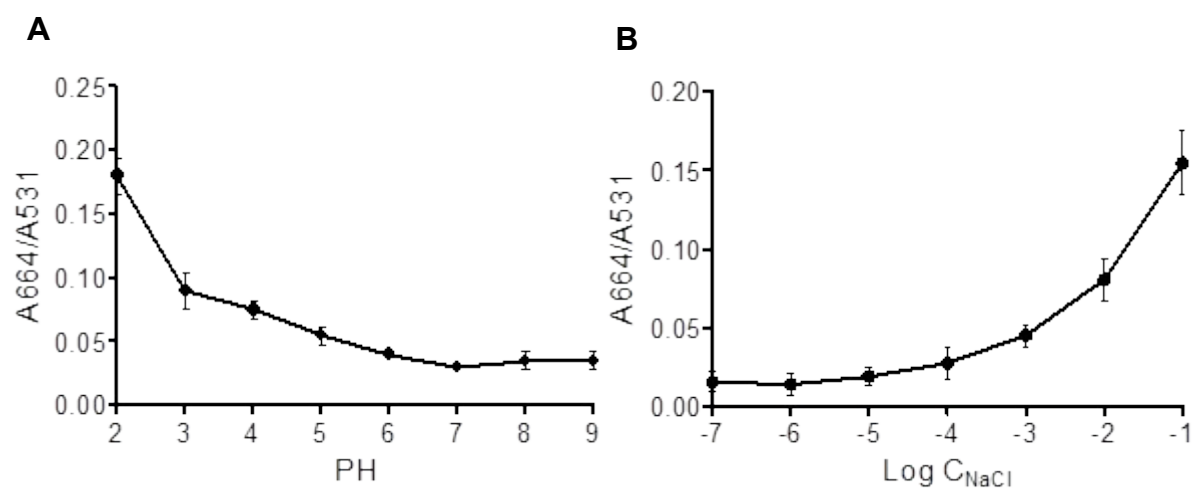

**Fig. S2.** Absorption ratio  $A_{664}/A_{531}$  of Au-lipid capsule under varied pH conditions (A) or with different NaCl concentration (B). All experiments were performed in triplicate. Error bars represent standard deviation.

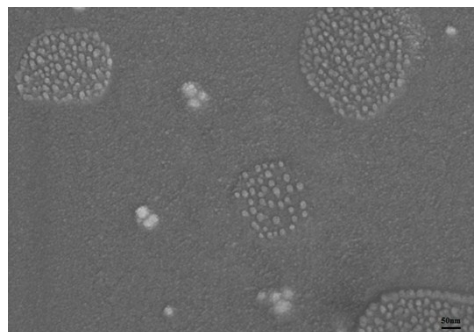

**Fig. S3.** The SEM image of Au-lipid capsules.

**Table S1** Comparison with other methods for gentamicin detection.

| Methods/materials         | Analytical ranges/LODs                              | Comments                                                       | References               |
|---------------------------|-----------------------------------------------------|----------------------------------------------------------------|--------------------------|
| HPLC                      | 0.1-1 mg kg <sup>-1</sup> /0.05 mg kg <sup>-1</sup> | Detection time:18 min, specific electrochemical detector       | (Posyniak et al. 2001)   |
| LC-MS                     | 6-600 ng mL <sup>-1</sup> /12.8 ng mL <sup>-1</sup> | Detection time:22 min, complex, expensive instrument           | (Turnipseed et al. 2009) |
| Enzyme-linked immunoassay | 25–200 µg kg <sup>-1</sup> /6.2 µg kg <sup>-1</sup> | Detection time:45 min, complex, high cost, time consuming      | (Chen et al. 2008)       |
| Colorimetric detection    | 0-0.2 µM/7.4 nM                                     | Detection time:1 min, visible, simple, low cost, high specific | This method              |

## References

- Chen, Y., Shang, Y., Li, X., Wu, X., Xiao, X., 2008. Food Chem 108(1), 304-309.
- Posyniak, A., Zmudzki, J., Niedzielska, J., 2001. J Chromatogr A 914(1), 59-66.
- Turnipseed, S.B., Clark, S.B., Karbiwnyk, C.M., Andersen, W.C., Miller, K.E., Madson, M.R., 2009. J Chromatogr B 877(14), 1487-1493.
